# Supplementary material for: Svep1 is a binding ligand of Tie1 and affects specific aspects of facial lymphatic development in a Vegfc-independent manner
Source: eLife. 2023 Apr 25;12:e82969. doi: 10.7554/eLife.82969 (PMC10129328; doi:10.7554/eLife.82969)
Supplement: Supplementary file 1. [file elife-82969-supp1.xlsx]

## Sheet: Tabelle1
gene	wildtype 5'-3'	mutant 5'-3'	common 5'-3'
adamts3hu10891	GAAGGTGACCAAGTTCATGCTGCCATGGTGGAATGGCACGATG	GAAGGTCGGAGTCAACGGATTGCCATGGTGGAATGGCACGATC	TTCTGTTATCAGTCGCATTTCCAGC (reverse)
adamts14hu11304	GAAGGTGACCAAGTTCATGCTTGGGAACAAACATCAACATTGTGCT	GAAGGTCGGAGTCAACGGATTTGGGAACAAACATCAACATTGTGCC	GCCTTACCTGTCGATATCCCACCA (reverse)
svep1hu6123	GAAGGTGACCAAGTTCATGCTCCTGGTAGCACAGATATATCAGACTGT	GAAGGTCGGAGTCAACGGATTCCTGGTAGCACAGATATATCAGACTGA	GTTGTTGTGTGGTCTGTAGCCTTCC (reverse)
svep1hu4767	GAAGGTGACCAAGTTCATGCTGGGGAGATGATGTCTCTTGCA	GAAGGTCGGAGTCAACGGATTGGGGAGATGATGTCTCTTGCT	CAGGCACTGTGCAGGTAAAGTCATT (reverse)
vegfchu6410	GAAGGTGACCAAGTTCATGCTGGCTGCTTTCATCAATCTTGAACTTTT	GAAGGTCGGAGTCAACGGATTGGCTGCTTTCATCAATCTTGAACTTTA	GGCGGTTCTAAATTAATAGTCACTCACTT
tie2hu1667	GAAGGTGACCAAGTTCATGCTGTCTTCTTGACGTACACCTCCTG	GAAGGTCGGAGTCAACGGATTGTCTTCTTGACGTACACCTCCTA	AGACTTCGGGCTGTCCAGAGGT
gene	foward 5'-3'	reverse 5'-3'
ccbe1hu10965	GCGCTGAACTTCAAGACTGG	ACAGACAGACAGCACAGCA
tie1bns208	TATTCCCACCACTCAGCAAG	ATGGTCACACAAGTCACAGC
tie1 primer for insitu probe generation
tie1 ISH probe 1	GGAGGAATGGTGCCTTTGGA	cattaaccctcactaaagggaaACATTGCCAAGCTGGTCTGA
tie1 ISH probe 2	CGCTGAAGAGGCCTGACTAC	cattaaccctcactaaagggaaCTTGCGTTTTCTGGGCCAC
tie1 ISH probe 3	TCATCCTCTACGCCTCTTCCT	cattaaccctcactaaagggaaGAGAGGTTAACGAGGAATAAAATGCA
cloning primers
hTie-1 fw	gcaGCTAGCagcggtggacctgacgctgctg
hTie-1 rev	cttAGATCTtaagcgtagtctgggacgtcgtatgggtaggcctcctcagctgtggc
hTie-2 fw	gcaGCTAGCagccatggacttgatcttgatcaattcc
hTie-2 rv	cttGCGGCCGCttaagcgtagtctgggacgtcgtatgggtaggccgcttcttcagcagaac
hSVEP-1 fw	gacGCTAGCcctctcgactgtggaaaacctc
hSVEP-1 rv	gcttGCGGCCGCttaaaacccagtcctcct
svep1zfPCRf1_fw:	ATGGTGACATTAAGACTTGCATTG
svep1zfPCRf2_fw:	TGTGATGGGGGAAAGGACT
svep1zfPCRf3_fw:	TGAGCCTCCATGGATTCAGT
svep1zfPCRf4_fw:	CTGGAGGATGGGGCAGTAA
svep1zfPCRf5_fw:	GAGGAGGGCCGCTCTTACT
svep1zfPCRf6_fw:	GGATGAGGTCGTCAGACACTG
svep1zfPCRf7_fw:	GCCGGTAAAATGTAAAGATCCA
svep1zfPCRf8_fw:	AGGAAGGCTTTGTTCTCAACAC
svep1zfPCRf9_fw:	CCATCGGACACACAATCCTAC
svep1zfPCRf10_fw:	CATGTGCACTCCAGCACAAT
svep1zfPCRf11_fw:	TTCGATGTGATGATGGCTACA
svep1zfPCRf12_fw:	ACGTGTCGTCAGGGAACAAGT
svep1zfPCRf1_rev:	GGCATGTGTTGTTGTGTGGT
svep1zfPCRf2_rev:	GTATACTGCAGTTTTTCTCCCAGTG
svep1zfPCRf3_rev:	TCTCAAGGGATTTGGGGTCT
svep1zfPCRf4_rev:	CTGTGAATCCTGGAAGACAGGT
svep1zfPCRf5_rev:	GGTATTGTAGTGCCAATGGACAG
svep1zfPCRf6_rev:	GGCTCCAAAGGAACATACCC
svep1zfPCRf7_rev:	CAGGAAATAGGCTGGCATGT
svep1zfPCRf8_rev:	TACCTCCTATCCATTGTCCACTC
svep1zfPCRf9_rev:	TGGCACTCATAGTGGATAAGCTC
svep1zfPCRf10_rev:	CCAACCTGCCACAGGAAATA
svep1zfPCRf11_rev:	GAGAACTCCAGGAGCCGTTT
svep1zfPCRf12_rev2:	AACCCTTGTAGAGTGGCACGTT
nebPCS2+ _ f1-4_5’UTR_fw	tgcaggatcccatcgattcggcggccgcACTTATATATCTCATAACCACTATTGGATGCTGGTGTTTGCGGCGTTATGATGGTGACATTAAGACTTG
nebPSC2+_f1-4_rv	tagaggctcgagaggccttgcgccggcgCTGTGAATCCTGGAAGAC
nebPSC2+_f5-8_fw	tgcaggatcccatcgattcggcggccgcGAGGAGGGCCGCTCTTAC
nebPSC2+_f5-8_rv	tagaggctcgagaggccttgcgccggcgTACCTCCTATCCATTGTCCAC
nebPSC2+_f9-12_fw	tgcaggatcccatcgattcggcggccgcCCATCGGACACACAATCC
nebPSC2+_f9-12_rv	tagaggctcgagaggccttgcgccggcgAACCCTTGTAGAGTGGCAC
zftie2-HA fw	TACCCATACGATGTTCCAGATTACGCTtgaTCTAGATTCTGCAGCCCTAT
zftie2-HA rv	TGGATCCCGGGCCCGCGGTACCG
zftie1-HA fw	TCTTTTTGCAGGATCCACCATGCTGCGTTTAATCTGC
zftie1-HA rv	CGTATGGGTAACTAGTGGCCTCTTCAGCGGTAGC
zftie2-FLAG fw	CATCGATTCGAATTCATCATGTGTCTGCTG
zftie2-FLAG rv	TGATGATGACTAGTGCCGGCCTCCTCCGCG
